# Supplementary material for: Pb2.28Ba1.72B10O19 featuring a three-dimensional B–O anionic network with edge-sharing [BO4] obtained under ambient pressure
Source: Royal Society of Chemistry journal article supplement (doi:10.1039/d1qi00653c), 2021-01-01

## Supporting Information

### **Pb<sub>2.28</sub>Ba<sub>1.72</sub>B<sub>10</sub>O<sub>19</sub> Featuring Three-dimensional B-O Anionic Network with Edge-Sharing [BO<sub>4</sub>] Obtained under Ambient Pressure**

Siru Guo,<sup>a,b</sup> Wenbin Zhang,<sup>a,b</sup> Rong Yang,<sup>a,b</sup> Min Zhang,<sup>a,b,\*</sup> Zhihua Yang,<sup>a,b</sup> and Shilie Pan<sup>a,b,\*</sup>

<sup>a</sup> CAS Key Laboratory of Functional Materials and Devices for Special Environments; Xinjiang Technical Institute of Physics & Chemistry, CAS; Xinjiang Key Laboratory of Electronic Information Materials and Devices, 40-1 South Beijing Road, Urumqi 830011, China

<sup>b</sup> Center of Materials Science and Optoelectronics Engineering, University of Chinese Academy of Sciences, Beijing 100049, China

\*Corresponding authors, E-mails: zhangmin@ms.xjb.ac.cn (Min Zhang);

slpan@ms.xjb.ac.cn (Shilie Pan).

**Table S1.** Crystallographic data for  $\text{Pb}_{2.28}\text{Ba}_{1.72}\text{B}_{10}\text{O}_{19}$ .

|                                                               |                                                                                                                       |
|---------------------------------------------------------------|-----------------------------------------------------------------------------------------------------------------------|
| Empirical formula                                             | $\text{Pb}_{2.28}\text{Ba}_{1.72}\text{B}_{10}\text{O}_{19}$                                                          |
| Temperature                                                   | 297(2) K                                                                                                              |
| Crystal system, space group                                   | Monoclinic, $C2/c$                                                                                                    |
| Unit cell dimensions                                          | $a = 11.912(8) \text{ \AA}$<br>$b = 6.616(5) \text{ \AA}$ , $\beta = 99.406(3)^\circ$<br>$c = 18.238(10) \text{ \AA}$ |
| Volume                                                        | $1418.0(16) \text{ \AA}^3$                                                                                            |
| Z, Calculated density                                         | 4, 5.250 Mg/m <sup>3</sup>                                                                                            |
| Absorption coefficient                                        | $31.823 \text{ mm}^{-1}$                                                                                              |
| $F(000)$                                                      | 1941                                                                                                                  |
| Crystal size                                                  | $0.104 \times 0.069 \times 0.047 \text{ mm}^3$                                                                        |
| Theta range for data collection                               | $2.264$ to $27.506^\circ$                                                                                             |
| Limiting indices                                              | $-15 \leq h \leq 15$ , $-7 \leq k \leq 8$ , $-23 \leq l \leq 23$                                                      |
| Reflections collected / unique                                | 6639 / 1619 [ $R(\text{int}) = 0.0828$ ]                                                                              |
| Completeness to $\theta = 27.506^\circ$                       | 99.70 %                                                                                                               |
| Goodness-of-fit on $F^2$                                      | 1.023                                                                                                                 |
| Final $R$ indices [ $F_o^2 > 2\sigma(F_o^2)$ ] <sup>[a]</sup> | $R_1 = 0.0329$ , $wR_2 = 0.0541$                                                                                      |
| $R$ indices (all data) <sup>[a]</sup>                         | $R_1 = 0.0470$ , $wR_2 = 0.0585$                                                                                      |
| Largest diff. peak and hole                                   | 1.806 and $-1.637 \text{ e} \cdot \text{\AA}^{-3}$                                                                    |

<sup>[a]</sup> $R_1 = \Sigma||F_o| - |F_c|| / \Sigma|F_o|$  and  $wR_2 = [\Sigma w(F_o^2 - F_c^2)^2 / \Sigma wF_o^4]^{1/2}$  for  $F_o^2 > 2\sigma(F_o^2)$

**Table S2.** Atomic coordinates and equivalent isotropic displacement parameters ( $\text{\AA}^2$ ) and BVS for  $\text{Pb}_{2.28}\text{Ba}_{1.72}\text{B}_{10}\text{O}_{19}$ .  $U_{(\text{eq})}$  is defined as one third of the trace of the orthogonalized  $U_{ij}$  tensor.

| Atoms  | $x$        | $y$         | $z$       | $U_{\text{eq}}(\text{\AA}^2)$ | S.O.F. | BVS  |      |
|--------|------------|-------------|-----------|-------------------------------|--------|------|------|
| Pb(1)  | 0.5881(1)  | 1.2825(1)   | 0.4888(1) | 0.010(1)                      | 1      | 2.19 |      |
| Ba(1A) | 0.3006(1)  | -0.1107(1)  | 0.6919(1) | 0.010(1)                      | 0.86   | 2.51 | 2.38 |
| Pb(1A) | 0.3006(1)  | -0.1107(1)  | 0.6919(1) | 0.010(1)                      | 0.14   | 1.58 |      |
| B(1)   | 0.3409(12) | 0.3370(20)  | 0.6267(7) | 0.009(3)                      | 1      | 2.98 |      |
| B(2)   | 0.6286(11) | 0.8890(20)  | 0.6261(7) | 0.008(3)                      | 1      | 3.03 |      |
| B(3)   | 0.7057(11) | 0.8960(20)  | 0.4989(7) | 0.007(2)                      | 1      | 2.93 |      |
| B(4)   | 0.5406(11) | 0.2270(20)  | 0.6669(7) | 0.008(3)                      | 1      | 3.02 |      |
| B(5)   | 0.4975(11) | 0.5990(20)  | 0.6758(7) | 0.006(2)                      | 1      | 3.05 |      |
| O(1)   | 0.3823(6)  | 0.5448(12)  | 0.6386(4) | 0.006(1)                      | 1      | 2.07 |      |
| O(2)   | 0.5000     | 0.6847(17)  | 0.7500    | 0.006(2)                      | 1      | 2.10 |      |
| O(3)   | 0.2377(7)  | 0.2922(12)  | 0.6573(4) | 0.006(2)                      | 1      | 1.96 |      |
| O(4)   | 0.8157(6)  | 0.8099(12)  | 0.5424(4) | 0.006(2)                      | 1      | 1.97 |      |
| O(5)   | 0.6237(7)  | 0.9417(13)  | 0.5476(4) | 0.009(2)                      | 1      | 2.04 |      |
| O(6)   | 0.5767(7)  | 0.4250(13)  | 0.6775(4) | 0.009(2)                      | 1      | 2.08 |      |
| O(7)   | 0.6248(7)  | 0.0858(13)  | 0.6683(4) | 0.010(2)                      | 1      | 2.06 |      |
| O(8)   | 0.4278(7)  | 0.1856(13)  | 0.6551(4) | 0.012(2)                      | 1      | 2.22 |      |
| O(9)   | 0.7192(7)  | 0.10680(14) | 0.4546(4) | 0.008(2)                      | 1      | 2.20 |      |
| O(10)  | 0.5311(7)  | 0.7619(13)  | 0.6298(4) | 0.008(1)                      | 1      | 2.05 |      |

**Table S3.** Selected bond lengths (Å) and angles (°) for Pb<sub>2.28</sub>Ba<sub>1.72</sub>B<sub>10</sub>O<sub>19</sub>.

| Bond lengths         |           |                          |            |
|----------------------|-----------|--------------------------|------------|
| Pb(1)-O(9)           | 2.271(8)  | B(1)-O(8)                | 1.472(17)  |
| Pb(1)-O(10)#1        | 2.404(8)  | B(1)-O(4)#6              | 1.528(15)  |
| Pb(1)-O(5)           | 2.503(8)  | B(2)-O(10)               | 1.443(16)  |
| Pb(1)-O(9)#2         | 2.557(8)  | B(2)-O(5)                | 1.465(15)  |
| Pb(1)-O(1)#1         | 2.663(8)  | B(2)-O(3)#10             | 1.476(15)  |
| Pb(1)-O(5)#1         | 2.904(6)  | B(2)-O(7)#11             | 1.519(16)  |
| Pb(1)-O(4)#2         | 3.020(8)  | B(3)-O(9)                | 1.421(15)  |
| Ba/Pb(1A)-O(8)       | 2.631(9)  | B(3)-O(5)                | 1.456(14)  |
| Ba/Pb(1A)-O(6)#6     | 2.648(8)  | B(3)-O(4)                | 1.526(14)  |
| Ba/Pb(1A)-O(9)#4     | 2.658(7)  | B(3)-O(4)#12             | 1.556(15)  |
| Ba/Pb(1A)-O(1)#7     | 2.719(8)  | B(4)-O(8)                | 1.353(16)  |
| Ba/Pb(1A)-O(2)#7     | 2.788(6)  | B(4)-O(7)                | 1.368(16)  |
| Ba/Pb(1A)-O(3)       | 2.813(8)  | B(4)-O(6)                | 1.383(15)  |
| Ba/Pb(1A)-O(7)#8     | 2.870(8)  | B(5)-O(10)               | 1.461(15)  |
| Ba/Pb(1A)-O(7)#6     | 2.883(8)  | B(5)-O(2)                | 1.464(13)  |
| Ba/Pb(1A)-O(3)#9     | 2.932(7)  | B(5)-O(1)                | 1.473(14)  |
| B(1)-O(3)            | 1.460(16) | B(5)-O(6)                | 1.485(15)  |
| B(1)-O(1)            | 1.466(16) |                          |            |
| Bond angles          |           |                          |            |
| O(9)-Pb(1)-O(10)#1   | 90.5(3)   | O(6)#6- Ba/Pb(1A)-O(9)#4 | 88.2(2)    |
| O(9)-Pb(1)-O(5)#1    | 103.2(3)  | O(8)- Ba/Pb(1A)-O(1)#7   | 106.2(3)   |
| O(9)-Pb(1)-O(5)      | 58.6(3)   | O(6)#6- Ba/Pb(1A)-O(1)#7 | 116.9(2)   |
| O(10)#1-Pb(1)-O(5)   | 108.0(3)  | O(9)#4- Ba/Pb(1A)-O(1)#7 | 73.0(2)    |
| O(10)#1-Pb(1)-O(5)#1 | 50.9(2)   | O(8)- Ba/Pb(1A)-O(2)#7   | 88.2(3)    |
| O(10)#1-Pb(1)-O(4)   | 97.3(2)   | O(6)#6- Ba/Pb(1A)-O(2)#7 | 149.6(2)   |
| O(9)-Pb(1)-O(9)#2    | 75.0(3)   | O(9)#4- Ba/Pb(1A)-O(2)#7 | 111.34(18) |
| O(10)#1-Pb(1)-O(9)#2 | 140.4(3)  | O(1)#7- Ba/Pb(1A)-O(2)#7 | 52.9(2)    |
| O(5)-Pb(1)-O(5)#2    | 73.6(3)   | O(8)- Ba/Pb(1A)-O(3)     | 51.7(2)    |
| O(5)-Pb(1)-O(9)#2    | 95.6(3)   | O(6)#6- Ba/Pb(1A)-O(3)   | 70.5(2)    |
| O(9)-Pb(1)-O(4)      | 102.0(3)  | O(9)#4- Ba/Pb(1A)-O(3)   | 72.4(2)    |
| O(9)-Pb(1)-O(1)#1    | 80.4(3)   | O(1)#7- Ba/Pb(1A)-O(3)   | 144.3(2)   |
| O(10)#1-Pb(1)-O(1)#1 | 53.9(3)   | O(2)#7- Ba/Pb(1A)-O(3)   | 136.4(3)   |
| O(5)-Pb(1)-O(4)      | 147.4(2)  | O(8)- Ba/Pb(1A)-O(7)#8   | 77.4(2)    |
| O(5)-Pb(1)-O(1)#1    | 136.3(3)  | O(6)#6- Ba/Pb(1A)-O(7)#8 | 102.0(2)   |
| O(9)#2-Pb(1)-O(1)#1  | 87.0(2)   | O(3)-B(1)-O(1)           | 114.7(10)  |
| O(9)#2-Pb(1)-O(4)    | 52.2(2)   | O(3)-B(1)-O(8)           | 108.4(10)  |
| O(5)#1-Pb(1)-O(1)#1  | 104.7(2)  | O(1)-B(1)-O(8)           | 112.7(10)  |
| O(5)#1-Pb(1)-O(9)#2  | 167.8(3)  | O(3)-B(1)-O(4)#6         | 108.7(9)   |
| O(5)#1-Pb(1)-O(4)    | 138.9(2)  | O(1)-B(1)-O(4)#6         | 105.3(10)  |
| O(1)#1-Pb(1)-O(4)    | 49.0(2)   | O(8)-B(1)-O(4)#6         | 106.6(10)  |

|                          |            |                      |           |
|--------------------------|------------|----------------------|-----------|
| O(9)#4- Ba/Pb(1A)-O(7)#8 | 143.9(3)   | O(10)-B(2)-O(5)      | 106.3(9)  |
| O(1)#7- Ba/Pb(1A)-O(7)#8 | 128.3(2)   | O(10)-B(2)-O(3)#10   | 113.3(11) |
| O(2)#7- Ba/Pb(1A)-O(7)#8 | 76.2(2)    | O(5)-B(2)-O(3)#10    | 111.8(10) |
| O(3)- Ba/Pb(1A)-O(7)#8   | 78.6(2)    | O(10)-B(2)-O(7)#11   | 112.6(10) |
| O(8)- Ba/Pb(1A)-O(7)#6   | 156.3(2)   | O(5)-B(2)-O(7)#11    | 106.9(10) |
| O(6)#6- Ba/Pb(1A)-O(7)#6 | 49.6(2)    | O(3)#10-B(2)-O(7)#11 | 105.9(9)  |
| O(9)#4- Ba/Pb(1A)-O(7)#6 | 88.9(2)    | O(9)-B(3)-O(5)       | 109.2(10) |
| O(1)#7- Ba/Pb(1A)-O(7)#6 | 69.9(2)    | O(9)-B(3)-O(4)       | 115.3(10) |
| O(2)#7- Ba/Pb(1A)-O(7)#6 | 105.8(3)   | O(5)-B(3)-O(4)       | 111.4(9)  |
| O(3)- Ba/Pb(1A)-O(7)#6   | 117.8(2)   | O(9)-B(3)-O(4)#12    | 116.8(9)  |
| O(7)#8- Ba/Pb(1A)-O(7)#6 | 124.05(14) | O(5)-B(3)-O(4)#12    | 113.9(9)  |
| O(8)- Ba/Pb(1A)-O(3)#9   | 125.9(2)   | O(4)-B(3)-O(4)#12    | 89.1(8)   |
| O(6)#6- Ba/Pb(1A)-O(3)#9 | 78.7(2)    | O(8)-B(4)-O(7)       | 124.8(12) |
| O(9)#4- Ba/Pb(1A)-O(3)#9 | 164.6(2)   | O(8)-B(4)-O(6)       | 119.5(11) |
| O(1)#7- Ba/Pb(1A)-O(3)#9 | 105.8(2)   | O(7)-B(4)-O(6)       | 115.7(11) |
| O(2)#7- Ba/Pb(1A)-O(3)#9 | 77.92(16)  | O(10)-B(5)-O(2)      | 106.2(10) |
| O(3)- Ba/Pb(1A)-O(3)#9   | 110.0(2)   | O(10)-B(5)-O(1)      | 103.7(9)  |
| O(7)#8- Ba/Pb(1A)-O(3)#9 | 48.6(2)    | O(2)-B(5)-O(1)       | 113.4(9)  |
| O(7)#6- Ba/Pb(1A)-O(3)#9 | 76.5(2)    | O(10)-B(5)-O(6)      | 110.6(10) |
| O(8)- Ba/Pb(1A)-O(6)#6   | 121.4(3)   | O(2)-B(5)-O(6)       | 111.3(9)  |
| O(8)- Ba/Pb(1A)-O(9)#4   | 68.0(2)    | O(1)-B(5)-O(6)       | 111.3(9)  |

---

Symmetry transformations used to generate equivalent atoms:

#1  $-x+1, -y+2, -z+1$     #2  $-x+3/2, -y+5/2, -z+1$     #3  $-x+1, -y+3, -z+1$     #4  $-x+1, -y+1, -z+1$   
#5  $x+1/2, y+3/2, z$     #6  $x-1/2, y-1/2, z$     #7  $x, y-1, z$     #8  $-x+1, y, -z+3/2$     #9  $-x+1/2, y-1/2, -z+3/2$   
#10  $x+1/2, y+1/2, z$     #11  $x, y+1, z$     #12  $-x+3/2, -y+3/2, -z+1$     #13  $-x+1, y+1, -z+3/2$   
#14  $-x+1/2, y+1/2, -z+3/2$

**Table S4.** The geometric features and synthesis conditions of the edge-sharing [BO<sub>4</sub>] in previously reported borates.

|            | Compounds                                                                                                                        | Inside<br>O – B – O<br>angles (°) | Outside<br>O – B – O<br>angles (°) | B·····B<br>interatomic<br>distance (Å<br>) | A/B  | Synthesis conditions                       |
|------------|----------------------------------------------------------------------------------------------------------------------------------|-----------------------------------|------------------------------------|--------------------------------------------|------|--------------------------------------------|
| <b>0 D</b> | Ba <sub>4</sub> Na <sub>2</sub> Zn <sub>4</sub> (B <sub>3</sub> O <sub>6</sub> ) <sub>2</sub> (B <sub>12</sub> O <sub>24</sub> ) | 95.482                            | 111.565                            | 2.000                                      | 0.56 | Ambient pressure                           |
|            | Li <sub>4</sub> Na <sub>2</sub> CsB <sub>7</sub> O <sub>14</sub>                                                                 | 94.621                            | 110.599                            | 2.026                                      | 1.00 | Ambient pressure                           |
|            | BaAlBO <sub>4</sub>                                                                                                              | 94.062                            | 110.944                            | 2.098                                      | 2.00 | Ambient pressure                           |
|            | KZnB <sub>3</sub> O <sub>6</sub>                                                                                                 | 92.013                            | 113.972                            | 2.079                                      | 0.67 | Ambient pressure                           |
|            | LT-K <sub>3</sub> Sb <sub>4</sub> BO <sub>13</sub>                                                                               | 86.833                            | 110.9                              | 2.288                                      | 7.00 | Ambient pressure<br>(crystallize at 200 K) |
| <b>3 D</b> | Pb <sub>2.28</sub> Ba <sub>1.72</sub> B <sub>10</sub> O <sub>19</sub>                                                            | 89.066                            | 109.299                            | 2.199                                      | 0.40 | Ambient pressure                           |
| <b>2 D</b> | Ho <sub>4</sub> B <sub>6</sub> O <sub>15</sub>                                                                                   | 94.375                            | 109.722                            | 2.071                                      | 0.67 | 8 GPa, 1000 °C                             |
|            | HP-NiB <sub>2</sub> O <sub>4</sub>                                                                                               | 93.559                            | 114.688                            | 2.086                                      | 0.50 | 7.5 GPa, 680 °C                            |
|            | β-FeB <sub>2</sub> O <sub>4</sub>                                                                                                | 93.359                            | 113.835                            | 2.083                                      | 0.50 | 8 GPa, 1030 °C                             |
|            | HP-CoB <sub>2</sub> O <sub>4</sub>                                                                                               | 93.305                            | 114.179                            | 2.090                                      | 0.50 | 6.5 GPa, 950 °C                            |
|            | Dy <sub>4</sub> B <sub>6</sub> O <sub>15</sub>                                                                                   | 92.959                            | 109.490                            | 2.098                                      | 0.67 | 8 GPa, 1000 °C                             |
|            | La <sub>3</sub> B <sub>6</sub> O <sub>13</sub> (OH)-B3                                                                           | 92.720                            | 112.613                            | 2.077                                      | 0.50 | 6 GPa, 1400 °C                             |
|            | La <sub>3</sub> B <sub>6</sub> O <sub>13</sub> (OH)-B6                                                                           | 92.559                            | 113.266                            | 2.077                                      |      |                                            |
|            | β-CsB <sub>9</sub> O <sub>14</sub>                                                                                               | 89.272                            | 114.877                            | 2.169                                      | 0.11 | Vacuum sealed                              |
| <b>3 D</b> | α-Ho <sub>2</sub> B <sub>4</sub> O <sub>9</sub>                                                                                  | 94.270                            | 114.184                            | 2.040                                      | 0.50 | 10 GPa, 1050 °C                            |
|            | α-Gd <sub>2</sub> B <sub>4</sub> O <sub>9</sub>                                                                                  | 93.971                            | 113.592                            | 2.034                                      | 0.50 | 10 GPa, 1150 °C                            |
|            | α-Eu <sub>2</sub> B <sub>4</sub> O <sub>9</sub>                                                                                  | 93.627                            | 113.499                            | 2.054                                      | 0.50 | 10 GPa, 1150 °C                            |
|            | α-Tb <sub>2</sub> B <sub>4</sub> O <sub>9</sub>                                                                                  | 93.150                            | 114.275                            | 2.059                                      | 0.50 | 10 GPa, 1150 °C                            |
|            | α-Sm <sub>2</sub> B <sub>4</sub> O <sub>9</sub>                                                                                  | 92.730                            | 113.614                            | 2.071                                      | 0.50 | 7.5 GPa, 1050 °C                           |
|            | Co <sub>7</sub> B <sub>24</sub> O <sub>42</sub> (OH) <sub>2</sub> ·2H <sub>2</sub> O                                             | 90.613                            | 110.891                            | 2.148                                      | 0.29 | 6 GPa, 880 °C                              |
|            | α-Ba <sub>3</sub> [B <sub>10</sub> O <sub>17</sub> (OH) <sub>2</sub> ]                                                           | 89.966                            | 115.207                            | 2.169                                      | 0.30 | 1000 bar, 500 °C                           |
|            | HP-CsB <sub>5</sub> O <sub>8</sub>                                                                                               | 88.798                            | 115.745                            | 2.182                                      | 0.20 | 6 GPa, 900 °C                              |
|            | HP-KB <sub>3</sub> O <sub>5</sub>                                                                                                | 87.349                            | 114.838                            | 2.215                                      | 0.33 | 3 GPa, 600 °C                              |
|            | HP-TiB <sub>3</sub> O <sub>5</sub>                                                                                               | 87.175                            | 113.890                            | 2.211                                      | 0.33 | 6 GPa, 1400 °C                             |
|            | HP-(NH <sub>4</sub> )B <sub>3</sub> O <sub>5</sub>                                                                               | 87.070                            | 113.806                            | 2.215                                      | 0.33 | 3 GPa, 600 °C                              |
|            | HP-RbB <sub>3</sub> O <sub>5</sub>                                                                                               | 86.781                            | 113.942                            | 2.231                                      | 0.33 | 6 GPa, 1000 °C                             |

**Table S5.** The molecular formulas or FBBs contain ten boron atoms in anhydrous borates.

|                   | <b>Compounds</b>                                                        | <b>Space Group</b> | <b>FBBs</b>                                       | <b>B-O configurations</b> |
|-------------------|-------------------------------------------------------------------------|--------------------|---------------------------------------------------|---------------------------|
| <b>Ternary</b>    | $\text{Cu}_{15}(\text{B}_2\text{O}_5)_2(\text{BO}_3)_6\text{O}_2$       | $P\bar{1}$         | $\text{BO}_3+\text{B}_2\text{O}_5$                | 0D                        |
|                   | $\text{Ba}_2(\text{B}_{10}\text{O}_{17})$                               | $P\bar{1}$         | $\text{B}_{10}\text{O}_{23}$                      | 3D                        |
|                   | $\text{La}_4\text{B}_{10}\text{O}_{21}$                                 | $P2_1/n$           | $\text{B}_{10}\text{O}_{26}$                      | 3D                        |
|                   | $\text{Pr}_4(\text{B}_{10}\text{O}_{21})$                               | $P2_1/n$           | $\text{B}_{10}\text{O}_{26}$                      | 3D                        |
|                   | $\text{Pb}_6\text{B}_{10}\text{O}_{21}$                                 | $P\bar{1}$         | $\text{B}_{10}\text{O}_{21}$                      | 0D                        |
|                   | $\delta - \text{CsB}_5\text{O}_8$                                       | $Pccn$             | $\text{B}_{10}\text{O}_{19}$                      | 3D                        |
| <b>Quaternary</b> | $\text{Cs}_2\text{Na}_2(\text{B}_{10}\text{O}_{17})$                    | $C2/c$             | $\text{B}_{10}\text{O}_{21}$                      | 2D                        |
|                   | $\text{Cs}_2\text{K}_2(\text{B}_{10}\text{O}_{17})$                     | $C2/c$             | $\text{B}_{10}\text{O}_{21}$                      | 2D                        |
|                   | $\text{Na}_2\text{Tl}_2(\text{B}_{10}\text{O}_{17})$                    | $C2/c$             | $\text{B}_{10}\text{O}_{21}$                      | 2D                        |
|                   | $\text{Pb}_4\text{Zn}_2\text{B}_{10}\text{O}_{21}$                      | $Pbcn$             | $\text{B}_{10}\text{O}_{24}$                      | 2D                        |
|                   | $\text{Ba}_3\text{B}_{10}\text{O}_{17}\text{Br}_2$                      | $C2/c$             | $\text{B}_5\text{O}_{11}$                         | 2D                        |
|                   | $\text{Ca}_2\text{B}_{10}\text{O}_{14}\text{F}_6$                       | $Cmc2_1$           | $\text{B}_5\text{O}_9\text{F}_3$                  | 2D                        |
|                   | $\text{Sr}_2\text{B}_{10}\text{O}_{14}\text{F}_6$                       | $Cmc2_1$           | $\text{B}_5\text{O}_9\text{F}_3$                  | 2D                        |
|                   | $\text{La}_2\text{CaB}_{10}\text{O}_{19}$                               | $C2$               | $\text{B}_5\text{O}_{12}$                         | 2D                        |
|                   | $\text{Li}_2\text{Sr}_4\text{B}_{12}\text{O}_{23}$                      | $P2_1/c$           | $\text{B}_{10}\text{O}_{18}+\text{B}_2\text{O}_5$ | 3D                        |
| <b>Hexameric</b>  | $\text{NaBa}_4\text{B}_{10}\text{O}_{18}\text{BrF}_2$                   | $P2_1/n$           | $\text{B}_5\text{O}_{12}$                         | 3D                        |
| <b>Heptameric</b> | $\text{Cd}_3\text{LiNa}_4\text{Be}_4\text{B}_{10}\text{O}_{24}\text{F}$ | $R\bar{3}H$        | $\text{B}_{12}\text{O}_{24}+\text{BO}_3$          | 0D                        |
|                   | $\text{Sr}_3\text{LiNa}_4\text{Be}_4\text{B}_{10}\text{O}_{24}\text{F}$ | $R\bar{3}H$        | $\text{B}_{12}\text{O}_{24}+\text{BO}_3$          | 0D                        |
|                   | $\text{Ca}_3\text{Na}_4\text{LiBe}_4\text{B}_{10}\text{O}_{24}\text{F}$ | $R\bar{3}H$        | $\text{B}_{12}\text{O}_{24}+\text{BO}_3$          | 0D                        |
|                   | $\text{Li}_4\text{NaKAl}_4\text{Be}_3\text{B}_{10}\text{O}_{27}$        | $P\bar{4}3m$       | $(\text{B}/\text{Be})_3\text{O}_9$                | 3D                        |

**Figure S1.** The B-O configurations in  $\text{Pb}_4\text{Zn}_2\text{B}_{10}\text{O}_{21}$  and  $\text{Pb}_{2.28}\text{Ba}_{1.72}\text{B}_{10}\text{O}_{19}$ . (a)  $[\text{B}_{10}\text{O}_{24}]$  FBB; (b)  ${}^2_{\infty}[\text{B}_{10}\text{O}_{21}]$  layers in  $\text{Pb}_4\text{Zn}_2\text{B}_{10}\text{O}_{21}$ . (c)  $[\text{B}_{10}\text{O}_{24}]$  FBB; (d)  ${}^3_{\infty}[\text{B}_{10}\text{O}_{19}]$  network in  $\text{Pb}_{2.28}\text{Ba}_{1.72}\text{B}_{10}\text{O}_{19}$ .

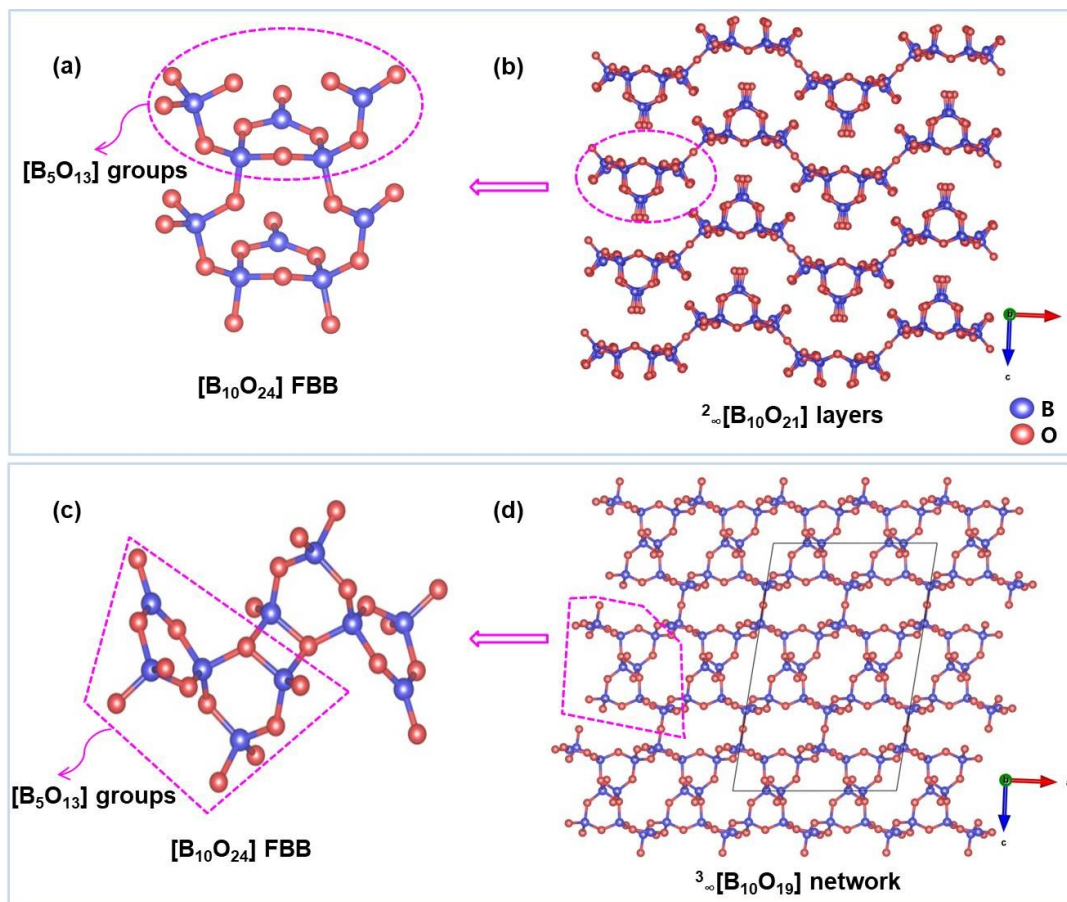



**Figure S2.** The UV-vis-NIR diffuse reflectance spectrum of  $\text{Pb}_{2.28}\text{Ba}_{1.72}\text{B}_{10}\text{O}_{19}$ .

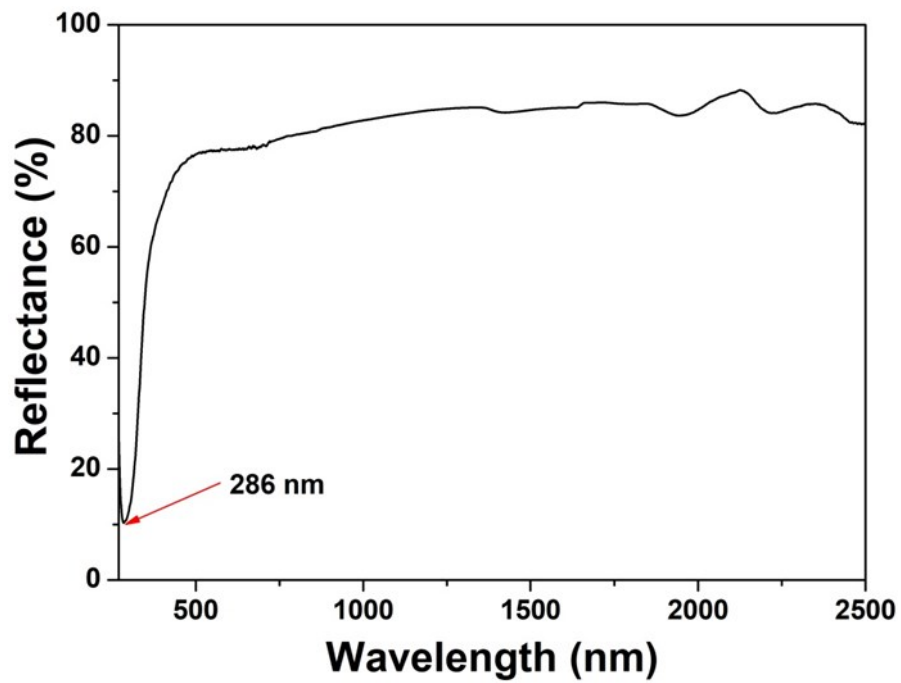

**Figure S3.** The TG-DSC curves of  $\text{Pb}_{2.28}\text{Ba}_{1.72}\text{B}_{10}\text{O}_{19}$ .

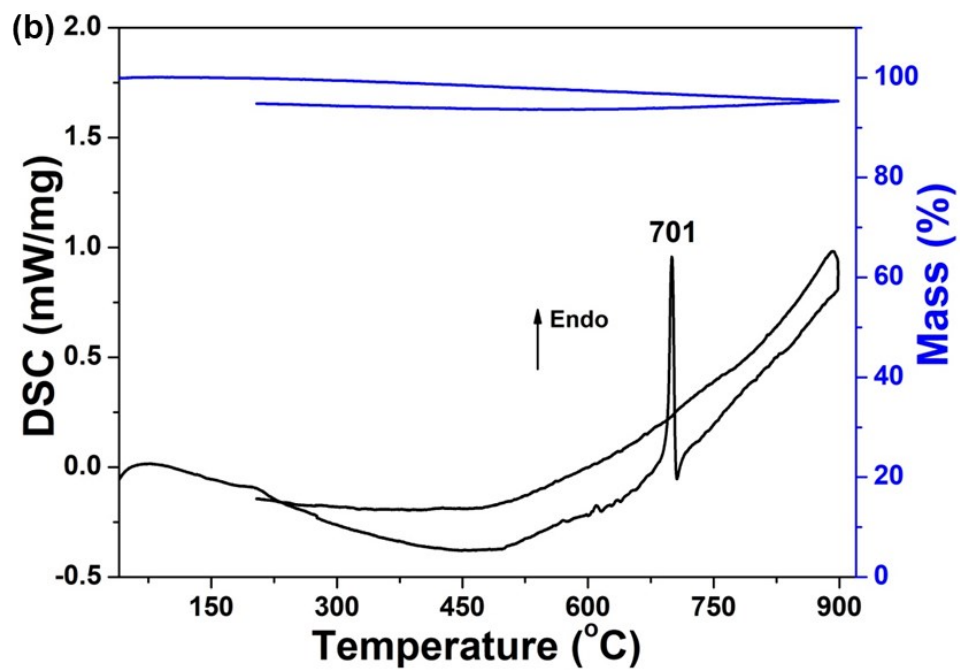

**Figure S4.** The powder X-ray diffraction patterns of  $\text{Pb}_{2.28}\text{Ba}_{1.72}\text{B}_{10}\text{O}_{19}$ .

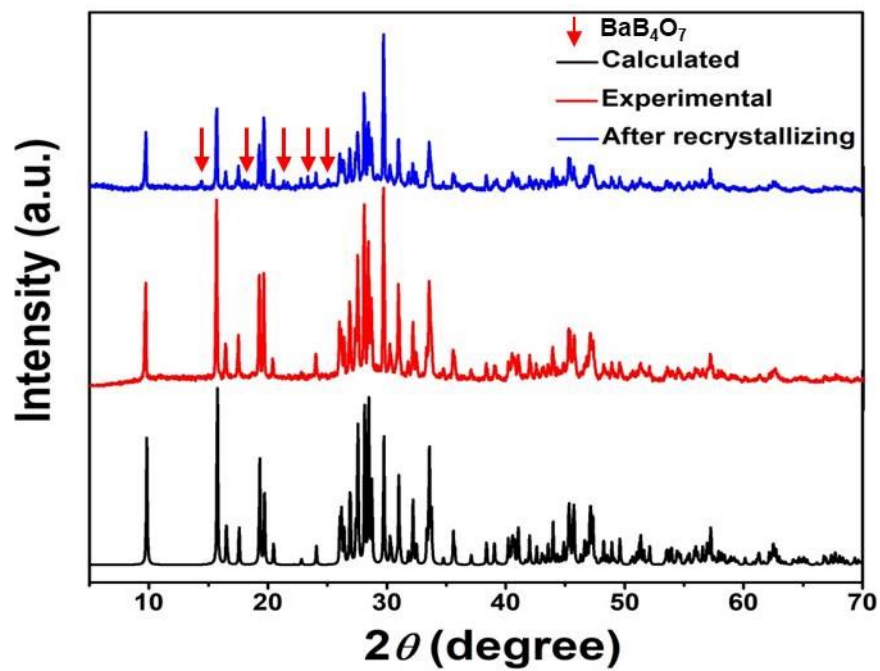

**Figure S5.** The electronic band structure of the model of  $\text{Pb}_{2.28}\text{Ba}_{1.72}\text{B}_{10}\text{O}_{19}$ .

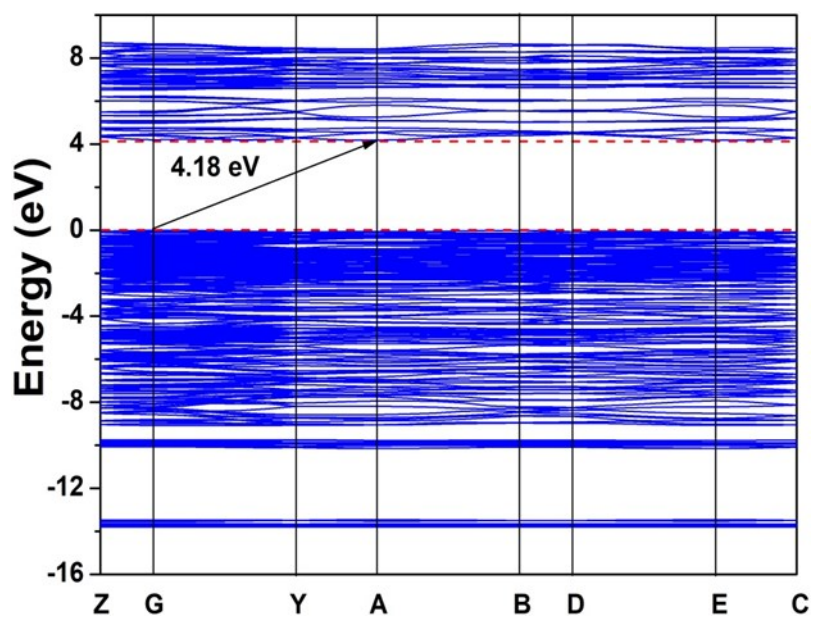

**Figure S6.** The calculated birefringence of the model of  $\text{Pb}_{2.28}\text{Ba}_{1.72}\text{B}_{10}\text{O}_{19}$ .

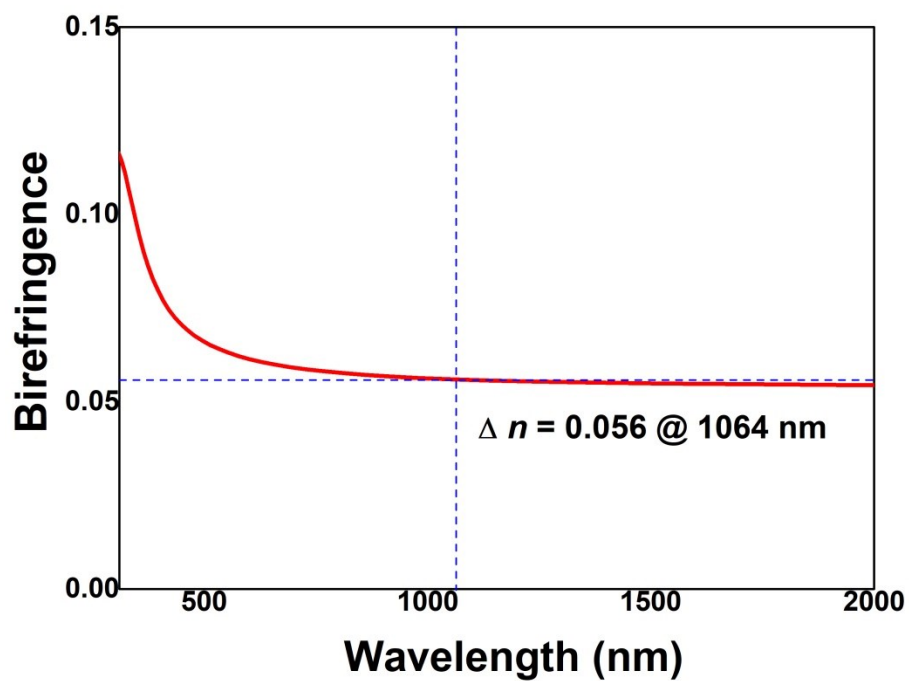

Supplement: d1qi00653c1.pdf [file d1qi00653c1.pdf]
